# Supplementary material for: The return of the lesion for localization and therapy
Source: PubMed Central journal article supplement (PMC10393408; doi:10.1093/brain/awad123), 2023-04-11
Supplement: awad123_supplementary_data.pdf [file awad123_supplementary_data.pdf]

**Table S1. Non-exhaustive list of clinical conditions where lesions have been used therapeutically**

| <b>Clinical conditions</b> | <b>Historical targets for lesioning</b>                                                                                                                                                                                                                    | <b>MRgFUS targets<sup>a</sup></b>                        |
|----------------------------|------------------------------------------------------------------------------------------------------------------------------------------------------------------------------------------------------------------------------------------------------------|----------------------------------------------------------|
| Parkinson's disease        | Cortical motor areas, interior part of the internal capsule, pallidum, fields of Forel, choroidal artery territory, cerebral peduncle, rubrospinal and segmental tracts in the medulla oblongata, spinal cord, lateral cervical spinal cord, STN, thalamus | STN <sup>b</sup> , GPi, thalamus (VIM) <sup>b</sup>      |
| Dystonia                   | GPi, STN, thalamus, subthalamic region, fields of Forel, zona inserta, caudate, dentate nucleus, longitudinal medial fascicle, interstitial nucleus of Cajal, red nucleus, olive nucleus                                                                   | Thalamus (VIM/Vo)                                        |
| Essential tremor           | Cortical motor areas, internal capsule, cerebral peduncle, caudate, ansa lenticularis, pallidum, zona inserta, posterior subthalamic area, thalamus                                                                                                        | Thalamus (VIM) <sup>b</sup> , posterior subthalamic area |
| Epilepsy                   | Medial temporal lobe (amygdala), thalamus, pallidum, dentate, fornix                                                                                                                                                                                       | Thalamus (ANT)                                           |
| Pain                       | Prefrontal cortex (leucotomy), anterior cingulate cortex, mesencephalon (trigemino- or spinothalamic tracts), thalamus, hypothalamus, pituitary, primary sensorimotor cortices                                                                             | thalamus (CL/VPM/VPL), anterior cingulate cortex         |
| Addiction                  | Anterior cingulate cortex, Nucleus accumbens, hypothalamus                                                                                                                                                                                                 |                                                          |
| OCD                        | Limbic regions (leucotomy), anterior capsule, anterior cingulate cortex, tracts ventral to the head of the caudate nucleus (subcaudate tractotomy)                                                                                                         | anterior limb of the internal capsule                    |
| Depression                 | Limbic regions (leucotomy), anterior capsule, anterior cingulate cortex, tracts ventral to the head of the caudate nucleus (subcaudate tractotomy)                                                                                                         | anterior limb of the internal capsule                    |
| Eating disorders           | Limbic regions (leucotomy), thalamus, nucleus accumbens, anterior limb of the internal capsule                                                                                                                                                             | -                                                        |
| Schizophrenia              | Frontal lobe, Limbic regions (leucotomy), septal region, tracts ventral to the head of the caudate nucleus (subcaudate tractotomy), anterior cingulate cortex, anterior capsule, hypothalamus, orbitoventromedial undercutting, thalamus                   | -                                                        |

For some conditions multiple different targets in the thalamus are listed as "thalamus". Note that the table is not intended as a comprehensive list of all clinical conditions and targets.

ANT = anterior nuclei of thalamus. CL/VPM/VPL = centrolateral/ventroposteromedial/-lateral nucleus of the thalamus.

GPi = globus pallidus interna. OCD = obsessive-compulsive disorder. STN = subthalamic nucleus. VIM = ventrointermediate nucleus of the thalamus. Vo = Vento-oral nucleus of the thalamus.

<sup>a</sup>Targets lesioned using MR-guided focused ultrasound (MRgFUS).

<sup>b</sup>Efficacy validated in clinical randomized controlled trials.
